# Supplementary material
Source: Research Square preprint supplement (doi:10.21203/rs.3.rs-8692626/v1)
Supplement: Supplementary file 1 [file 8fd1ff1c92add1da005f341c.docx]

**SUPPLEMENTARY MATERIAL**

**Event-like enrichment of beryllium isotopes and rare-earth elements at ~10.2 Ma from IODP Site U1430, Ulleung Basin (East Sea)**

Kyeong Ja Kim1*,

Yire Choi1;

Hiroyuki Matsuzaki2,

Gilyoung Kim1

1Geological Research Division, Korea Institute of Geosciences & Mineral Resources, Daejeon 34132 South Korea;

2Department MALT, University of Tokyo, Tokyo 113-0033, Japan

Correspondence : Kyeong Ja Kim1

1Geological Research Division,

Korea Institute of Geosciences & Mineral Resources 124 Gwahak-ro, Yuseong-gu

Daejeon 34132, South Korea.

Telephone: +82 42 868 3669

Fax: +82 42 868 3413

Email: [kjkim@kigam.re.kr](mailto:kjkim@kigam.re.kr)

Supplemental Figure 1. Age model of sediment core Hole U1430A (Modified after Tada et al. 2015) and the profile of GRA bulk density (Modified after IODP 2020b).


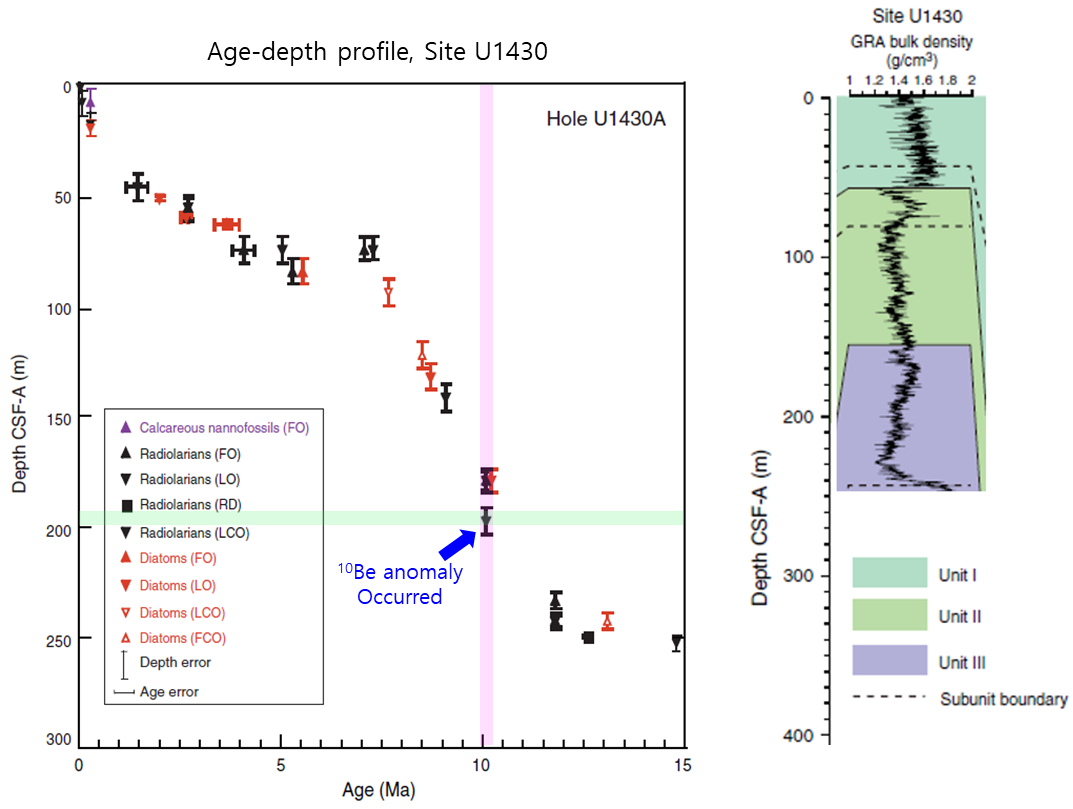


Supplemental Figure 2. 10Be concentrations at depths, along with a partial shipboard sample data set of U1430A (IODP 2020d). Two tephra deposited depths are within the 10Be anomaly section, and increases in both GRA and natural gamma radiation counts were observed in this section.


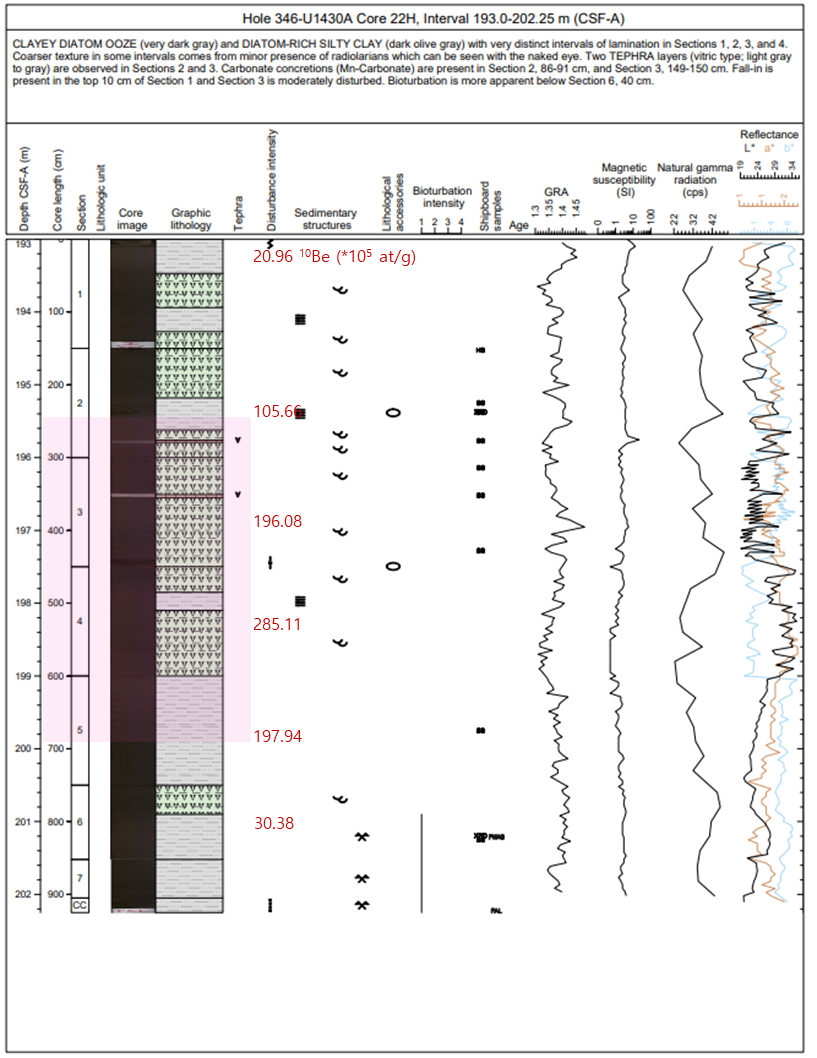


Supplemental Figure 3. 10Be concentrations at depths along with a partial shipboard sample data set of U1430B (IODP 2020d). Two tephra deposited depths were within the 10Be anomaly section, and increases in both GRA and natural gamma radiation counts were observed in this section.


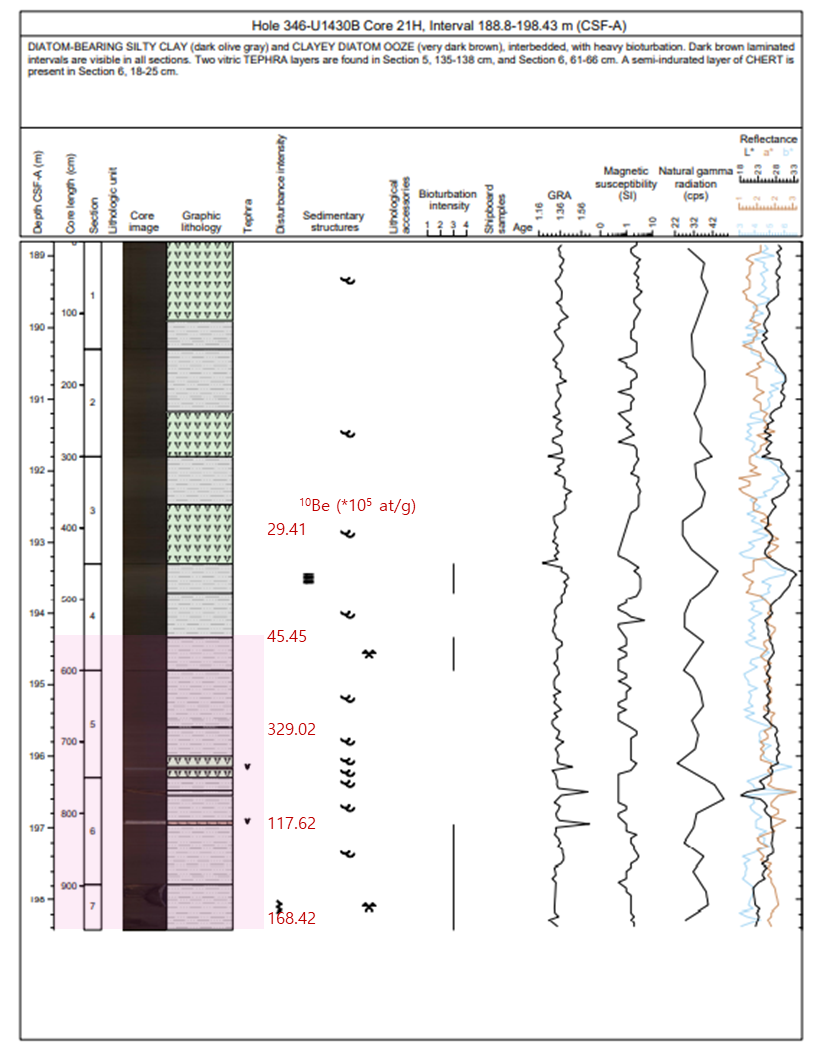


Table S1. Results of this study (10Be anomalies in sediment samples of the two cores).

| Sample ID | Depth (m) | Age (Myr) | 10Be (105 at/g) present | 9Be  (1016 at/g) | 10Be/9Be  (10-10 at/at) |
| --- | --- | --- | --- | --- | --- |
| B111 | 177.75 | 9.77 | 8.0±11.0 | 4.71±0.28 | 0.17±0.23 |
| B112 | 179.08 | 9.80 | 21.4±12.5 | 4.61±0.18 | 0.46±0.27 |
| B113 | 180.9 | 9.85 | 13.4±12.5 | 4.12±0.25 | 0.32±0.30 |
| B114 | 182.5 | 9.89 | 18.7±11.0 | 4.47±0.36 | 0.34±0.25 |
| B115 | 184.1 | 9.93 | 13.4±11.0 | 3.92±0.19 | 0.26±0.28 |
| B116 | 185.7 | 9.97 | 13.4±11.0 | 5.23±0.19 | 0.12±0.21 |
| B117 | 187.3 | 10.01 | 5.3±11.0 | 4.40±0.21 | 0.34±0.25 |
| A04 | 188.8 | 10.04 | 0.27±* | 9.69±0.35 | 0.18±* |
| A05 | 190.3 | 10.08 | 79.06±12.24 | 12.19±0.29 | 0.44±0.10 |
| A06 | 191.5 | 10.11 | 20.96±25.44 | 16.65±0.45 | 0.19±0.15 |
| *A07* | *195.3* | *10.20* | *105.66±17.18* | *9.94±0.21* | *0.68±0.17* |
| *A08* | *196.8* | *10.24* | *196.08±12.56* | *15.68±0.45* | *0.67±0.08* |
| *A09* | *198.3* | *10.28* | *285.11±18.17* | *12.36±0.50* | *1.17±0.16* |
| *A10* | *199.8* | *10.31* | *197.94±12.27* | *10.91±0.34* | *1.01±0.12* |
| A11 | 201.0 | 10.34 | 30.38±20.60 | 12.24±0.40 | 0.32±0.17 |
| A12 | 206.0 | 10.47 | 0.27±* | 11.80±0.31 | 0.15±* |
| A13 | 207.5 | 10.50 | 20.35±26.90 | 7.20±0.20 | 0.53±0.37 |
| B118 | 188.9 | 10.05 | 18.71±11.06 | 5.46±0.27 | 0.34±0.25 |
| B119 | 191.6 | 10.11 | 16.04±11.07 | 4.16±0.28 | 0.39±0.20 |
| B120 | 192.9 | 10.15 | 29.41±11.32 | 3.84±0.34 | 0.77±0.27 |
| *B121* | *194.3* | *10.18* | *45.45±11.14* | *4.32±0.15* | *1.05±0.30* |
| *B122* | *195.7* | *10.21* | *329.02±18.10* | *21.37±0.70* | *1.54±0.26* |
| *B123* | *197.1* | *10.25* | *117.62±13.13* | *4.53±0.15* | *2.60±0.098* |
| *B124* | *198.4* | *10.28* | *168.42±14.26* | *4.50±0.18* | *3.75±0.30* |
| B125 | 203.2 | 10.40 | 24.06±11.08 | 3.23±0.14 | 0.75±0.35 |
| B126 | 204.8 | 10.44 | 5.35±11.03 | 4.21±0.30 | 0.13±0.34 |
| B127 | 206.38 | 10.478 | 18.71±21.05 | 4.90±0.12 | 0.38±0.26 |
| B128 | 208.00 | 10.518 | 2.67±11.02 | 4.48±0.11 | 0.06±0.43 |
| B129 | 211.04 | 10.593 | 10.69±11.02 | 4.39±0.12 | 0.24±0.25 |
| B130 | 212.66 | 10.633 | 10.69±11.02 | 4.80±0.30 | 0.22±0.25 |
| B131 | 214.28 | 10.673 | 13.37±11.02 | 3.50±0.30 | 0.38±0.23 |
| B132 | 215.90 | 10.713 | 8.02±11.02 | 5.39±0.11 | 0.15±0.32 |
| B133 | 217.52 | 10.753 | 18.71±11.02 | 2.81±0.14 | 0.67±0.20 |
| B134 | 222.16 | 10.867 | 16.04±11.02 | 4.33±0.25 | 0.37±0.39 |
| B135 | 223.77 | 10.907 | 10.69±11.02 | 3.86±0.34 | 0.28±0.26 |
| B136 | 225.39 | 10.947 | 8.02±11.02 | 3.89±0.12 | 0.21±0.29 |
| B137 | 227.01 | 10.987 | 18.71±11.02 | 4.78±0.44 | 0.39±0.28 |
| B138 | 237.91 | 11.256 | 21.39±11.02 | 4.44±0.26 | 0.48±0.23 |
| B139 | 239.56 | 11.297 | 2.67±11.02 | 2.58±0.19 | 0.10±0.25 |
| B140 | 239.56 | 11.297 | 8.02±11.02 | 4.05±0.16 | 0.20±0.43 |
| B141 | 240.58 | 11.322 | 5.35±11.02 | 3.86±0.08 | 0.14±0.27 |
| B142 | 243.14 | 11.385 | 16.04±11.02 | 6.67±0.20 | 0.24±0.29 |
| B143 | 244.42 | 11.417 | 18.71±11.02 | 5.00±0.43 | 0.37±0.17 |

*Note: The sample ID is given as sample processing ID of this study and the depths of samples used for this study can be found at the IODP Expedition 346 site (IODP 2020a). * indicates for large error associated due to the detection limit of AMS.*

Table S2. Possible mechanisms for the 10.2 Ma 10Be anomaly and their expected signatures

| Scenario | Expected 10Be | | 9Be | | REE | Spatial synchronicity | Consistency with U1430 |
| --- | --- | --- | --- | --- | --- | --- | --- |
| Sedimentation rate change | | ↑Concentration only | | No ↑ | No ↑ | local | x |
| Redox/scavenging | | variable | | variable | Element-specific | local | x |
| Volcanic input | | minor | | minor | Element-dependent | regional | x |
| Solar variability | | 10Be only | | No ↑ | No ↑ | Global but short-lived | x |
| Astrophysical event (SN/heliosphere) | | ↑ | | ↑ | ↑ | Supra-regional | V |
